# Supplementary material for: Near-infrared luminescent lanthanide (Er, Nd) complexes covalently bonded to a terpyridine-functionalized silica matrix
Source: Royal Society of Chemistry journal article supplement (doi:10.1039/b701503h), 2007-04-03
Supplement: b701503h.pdf [file b701503h.pdf]

## 1. Chemicals and procedures:

The solvent acetonitrile was dried with calcium hydride and redistilled. Erbium and Neodymium nitrates were obtained from the corresponding oxides  $\text{Er}_2\text{O}_3$  (99.99%) and  $\text{Nd}_2\text{O}_3$  (99.99%).

TPY-Si was prepared as follows: A mixture of MPS (1.7mmol), ATP (1.7mmol), 2, 2'-azobisisobutyronitrile (AIBN, 0.05mmol) and acetonitrile (15mL) were heated to  $80^\circ\text{C}$  for 6 h under nitrogen. Then the solvent was removed in vacuo and the pasty residue was washed with cold hexane, then a clear oil of TPY-Si was obtained.

The hybrid materials were prepared as follows: TPY-Si (0.50g, 1.0mmol) was dissolved in 2mL of DMF, then TEOS and  $\text{H}_2\text{O}$  were added to it with the molar ratio 1:4:16 (TPY-Si:TEOS: $\text{H}_2\text{O}$ ) under stirring. The  $\text{Er}(\text{NO}_3)_3$  ( $\text{Nd}(\text{NO}_3)_3$ ) and DBM solution of DMF were added to the resulting mixture, the mole ratio of TPY-Si/ $\text{Ln}^{3+}$ /DBM was 1:1:3. The mixture was agitated magnetically to achieve a single phase and then transferred into a cuvette. Thermal curing was performed at  $60^\circ\text{C}$  and continued until the sample solidified. After 5 days, the samples were dried for 24 h at  $100^\circ\text{C}$  and collected as monolithic bulks and ground as powder materials for the photophysical studies.

## 2. The spectra of TPY-Si and hybrid materials

### List of Figures

**Fig. 1** FT-IR spectra for ATP (A), TPY-Si (B),  $\text{Er}(\text{DBM})_3\text{TPY-Si}$  (C) and  $\text{Nd}(\text{DBM})_3\text{TPY-Si}$  (D).

**Fig. 2**  $^1\text{H}$  NMR spectrum of TPY-Si ( $\text{DMSO}-d_6$ ).

**Fig. 3** Mass spectrum of TPY-Si.

**Fig. 4** UV-Vis spectra of ATP and DBM.

**Fig. 5** DR spectra of  $\text{Er}(\text{DBM})_3\text{TPY-Si}$  and  $\text{Nd}(\text{DBM})_3\text{TPY-Si}$

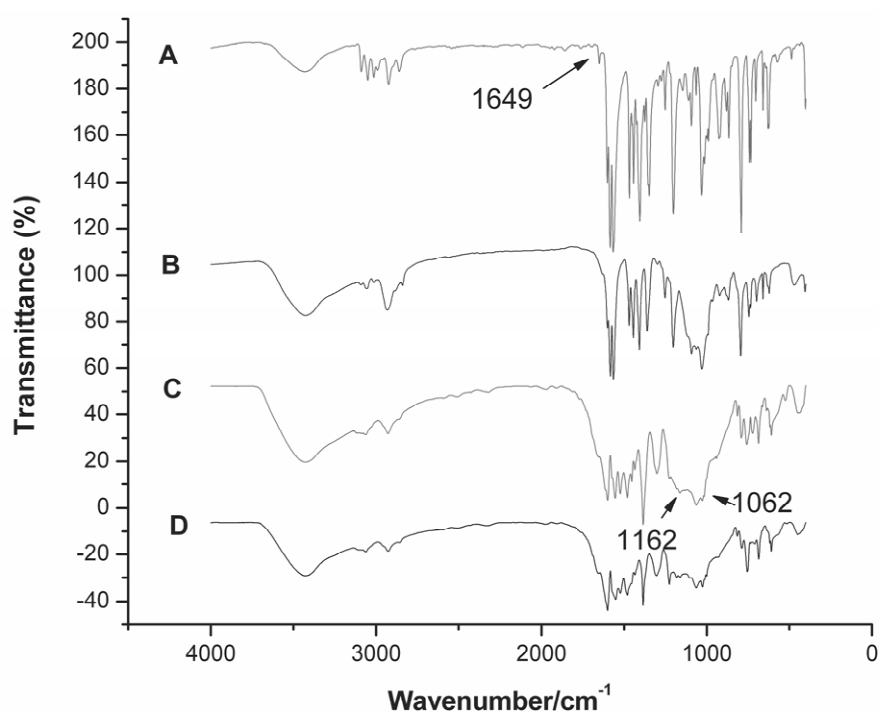

**Fig. 1** FT-IR spectra for ATP (A), TPY-Si (B), Er(DBM)<sub>3</sub>TPY-Si (C) and Nd(DBM)<sub>3</sub>TPY-Si (D).

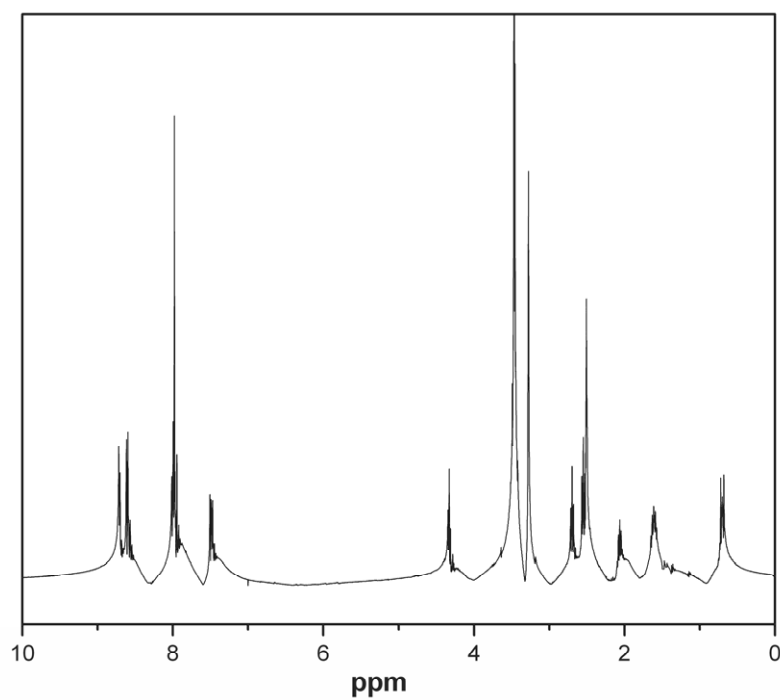

**Fig. 2** <sup>1</sup>H NMR spectrum of TPY-Si (DMSO-*d*<sub>6</sub>).

xqbd #255 RT: 3.44 AV: 1 NL: 9.83E7  
T: + c Full ms [ 29.00-800.00]

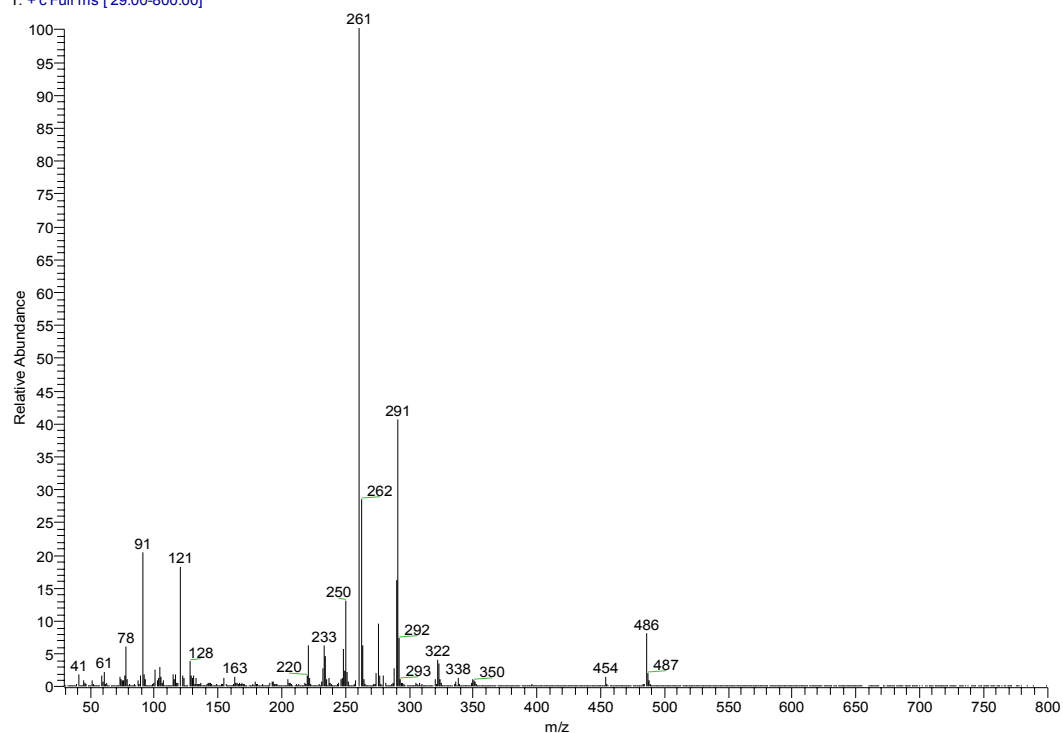

**Fig. 3** Mass spectrum of TPY-Si.

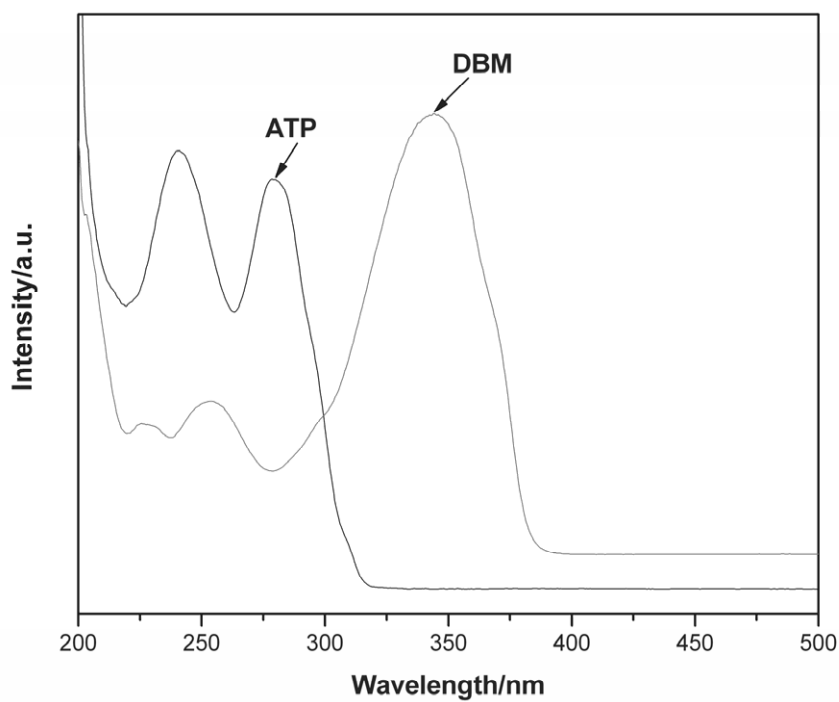

**Fig. 4** UV-Vis spectra of ATP and DBM.

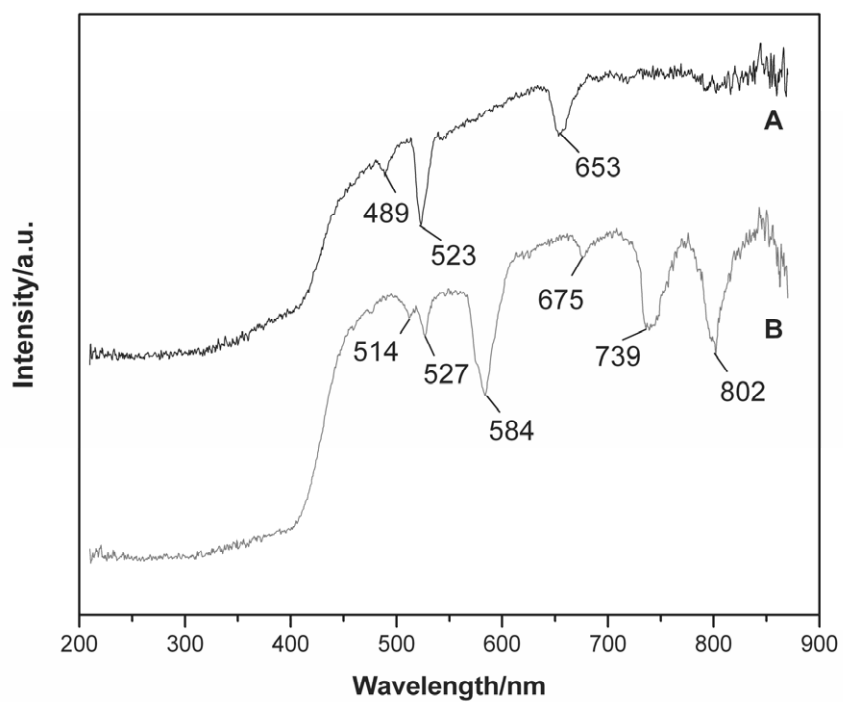

**Fig. 5** DR spectra of Er(DBM)<sub>3</sub>TPY-Si and Nd(DBM)<sub>3</sub>TPY-Si
